# Supplementary material for: Physiological and Transcriptomic Analyses of Escherichia coli Serotype O157:H7 in Response to Rhamnolipid Treatment
Source: MDPI journal article supplement (doi:10.3390/microorganisms11082112), 2023-08-18
Supplement: s1 [file s1]

1 **Table S1.** Primers used in the study of gene expression in *E. coli* O157:H7.

| Gene name   | Primer         | Primer sequence (5'-3') |
|-------------|----------------|-------------------------|
| <i>lpxC</i> | <i>lpxC</i> -F | ATTCCAGCAACCAGCGCTAT    |
|             | <i>lpxC</i> -R | CGATGGCACAATCGAAGCTG    |
| <i>lpxH</i> | <i>lpxH</i> -F | GCGAACAGCAAAGAAGCCAA    |
|             | <i>lpxH</i> -R | GATAAGTTCATGCACCGCCG    |
| <i>fabA</i> | <i>fabA</i> -F | GCAATTGCCAGCACCGAAC     |
|             | <i>fabB</i> -R | CGCGCGGCCTTTACCTTC      |
| <i>accA</i> | <i>accA</i> -F | TTGCGCAACTGGCACGCCAT    |
|             | <i>accA</i> -R | GGCGCTGGCATAACCAAAGTT   |
| <i>cyoA</i> | <i>cyoA</i> -F | CGGCACTTATGACGGTATCTC   |
|             | <i>cyoA</i> -R | TCCACCTGGTTGTATTCGCTA   |
| <i>cyoC</i> | <i>cyoC</i> -F | GATGGCGGTGCTGATGGT      |
|             | <i>cyoC</i> -R | CACATCCAGGAAGTGCCAGA    |
| <i>flgC</i> | <i>flgC</i> -F | CGTTGATGTTGTCTGGAGAGAT  |
|             | <i>flgC</i> -R | CGTAAGGGTTTTTCAGCATCAT  |
| <i>flgD</i> | <i>flgD</i> -F | TCTGACTTTGTTGGTGGCG     |
|             | <i>flgD</i> -R | CGACTGGCTGTTATCAATCTGT  |
| <i>pgaA</i> | <i>pgaA</i> -F | CGTCGCTTATCGTAACCTGC    |
|             | <i>pgaA</i> -R | CGCAGTATCATAGTGACCAGCA  |
| <i>pgaB</i> | <i>pgaB</i> -F | TGTTCCACGATGATGCTTTG    |
|             | <i>pgaB</i> -R | TCGAATTTCTGCTCAGACTCC   |
| <i>dnaE</i> | <i>dnaE</i> -F | ATGTCCGAGGCGTAAGGCT     |
|             | <i>dnaE</i> -R | TCCAGGGCGTCAGTAAACAA    |

2

3 **Table S2.** KEGG enriched pathways of DEGs treated with RL.

| KEGG ID                        | Pathway                                      | Gene name                                                                                                                                                                                                                                                                                                | Count | p-adj                  |
|--------------------------------|----------------------------------------------|----------------------------------------------------------------------------------------------------------------------------------------------------------------------------------------------------------------------------------------------------------------------------------------------------------|-------|------------------------|
| <b>Up-regulated pathways</b>   |                                              |                                                                                                                                                                                                                                                                                                          |       |                        |
| eco03010                       | Ribosome                                     | <i>rpsJ/rplC/rplW/rplD/rplI/rpsS/rplB/rpsF/rpsC/rplV/ykgO/rplF/rpsE/rplO/rpsH/rpmD/rpsR/rp<br/>mC/rpsQ/rplK/rpsN/rplP/rplA/rplR/rplJ/rplE/rpsM/rplQ/rpsI/rpsK/rplN/rplL/rpsD/rpsB/rpl<br/>M/rplX/rpsA/rpsG/rplS/rpmJ/rpmH/rpmB/rplU/rplY/rpmA/rpsT/rpsO/rpsL/rpsU/rplT/rpmI/<br/>rpsP/rpmF/rpmG/rpmE</i> | 55    | 2.31×10 <sup>-32</sup> |
| eco00540                       | Lipopolysaccharide biosynthesis              | <i>lpxP/lpxK/waaA/lpxB/eptB/lpxM/arnT/eptA/waaG/rfaQ/kdsA/lpxH/lpxD/lpxA/eptC/rfaC/rfa<br/>P/waaO/lpxC/lpxT/gmhB/rfaF/kdsC/rfaD</i>                                                                                                                                                                      | 24    | 1.1×10 <sup>-4</sup>   |
| eco03070                       | Bacterial secretion system                   | <i>secY/yidC/secE/secG/secF/secA/secD/ffh/yajC/ftsY/gspK/secM/tatC/tatB/gspJ/tatE/tolC/gspL/e<br/>scC</i>                                                                                                                                                                                                | 19    | 4.5×10 <sup>-4</sup>   |
| eco03440                       | Homologous recombination                     | <i>priB/dnaN/recO/dnaE/priA/ssb1/dnaX/hoI/recR/ruvC/recB/recA/hoI/recF/recG/recJ/dnaT/h<br/>olB/ruvB/recD</i>                                                                                                                                                                                            | 20    | 4.5×10 <sup>-4</sup>   |
| eco00541                       | O-Antigen nucleotide sugar biosynthesis      | <i>cpsG/ugd/galF/gmd/wecC/wecB/rffG/rffC/rfbA/rffA/galU</i>                                                                                                                                                                                                                                              | 14    | 4.5×10 <sup>-4</sup>   |
| eco03060                       | Protein export                               | <i>secY/yidC/secE/secG/secF/secA/secD/ffh/yajC/ftsY/secM/tatC/lepB/tatB/tatE</i>                                                                                                                                                                                                                         | 15    | 6.0×10 <sup>-4</sup>   |
| eco00970                       | Aminoacyl-tRNA biosynthesis                  | <i>thrS/metG/glyS/hisS/aspS/lysS/glyQ/argS/cysS/proS/pheS/leuS/alaS/gltX/asnS/pheT/fmt</i>                                                                                                                                                                                                               | 17    | 0.01                   |
| eco03018                       | RNA degradation                              | <i>deaD/pnp/rhlE/rnr/rho/pcnB/recQ/rne/rhlB/eno</i>                                                                                                                                                                                                                                                      | 10    | 0.02                   |
| eco00061                       | Fatty acid biosynthesis                      | <i>fabH/fabA/accC/fabD/fadD/accA/accD/accB</i>                                                                                                                                                                                                                                                           | 8     | 0.02                   |
| eco00670                       | One carbon pool by folate                    | <i>purN/purH/glyA/folD/thyA/purU/fau/folA/gcvT/fmt</i>                                                                                                                                                                                                                                                   | 10    | 0.02                   |
| eco00190                       | Oxidative phosphorylation                    | <i>yoA/cyoB/nuoN/sdhC/nuoM/cyoC/cyoE/ppa/cyoD/nuoL/nuoJ/atpH/atpB/atpC/atpG/atpF/atp<br/>A/atpD/sdhD/atpE/nuoI/nuoH/nuoK/nuoG</i>                                                                                                                                                                        | 24    | 0.04                   |
| <b>Down-regulated pathways</b> |                                              |                                                                                                                                                                                                                                                                                                          |       |                        |
| eco01120                       | Microbial metabolism in diverse environments | <i>sseA/napA/fucO/ldhA/pflB/frdB/frdA/hybO/frdC/narG/mgsA/hchA/agp/aldB/pdxI/kdgK/gapA<br/>/frdD/tdcE/fbaB/cysQ/nifJ/yeaD/fumB/pyk/lysA/fumC/fucA/adhE/allC/allD/ulaC/ulaE/hybC/p<br/>ta/narH/tkt/ackA/torA/ulaA/lysC/yihX/hemL/tkt/ydiF/fumB/torZ/rhaB/pfkB/torD/allB/tal/glk/</i>                      | 93    | 2.13×10 <sup>-8</sup>  |

|          |                                          |                                                                                                                                                                                                              |    |                      |
|----------|------------------------------------------|--------------------------------------------------------------------------------------------------------------------------------------------------------------------------------------------------------------|----|----------------------|
|          |                                          | <i>ulaF/ulaD/narI/patD/xdhA/cadA/dmpG/maeB/narZ/glxK/ulaG/ahr/nrfA/yggF/ulaB/nfsA/csiD/hcaE/mhpD/eutG/ltaE/yihR/hyaA/cysN/gpmM/ybhJ/cysC/mhpB/galM/aceF/ppsA/thrB/narI/gabD/hcaD/eutE/asd/mhpC/hyaB/rhmD</i> |    |                      |
| eco00040 | Pentose and glucuronate interconversions | <i>uxuB/uxuA/uxaC/araA/uxaB/xylA/uxaA/fucA/ulaE/araB/xylB/rhaB/kduI/ulaF/ulaD/kduD</i>                                                                                                                       | 16 | 2.2×10 <sup>-4</sup> |
| eco00620 | Pyruvate metabolism                      | <i>ldhA/pflB/frdB/frdA/frdC/hchA/aldB/frdD/tdcE/nifJ/fumB/pyk/fumC/adhE/pta/ackA/fumB/pta/poxB/maeB/ahr/eutG/aceF/ppsA/maeA/eutE</i>                                                                         | 26 | 3.0×10 <sup>-3</sup> |
| eco00053 | Ascorbate and aldarate metabolism        | <i>garD/ulaC/ulaE/ulaA/gudD/ulaF/ulaD/lgoD/ulaG/ulaB</i>                                                                                                                                                     | 10 | 3.0×10 <sup>-3</sup> |
| eco00052 | Galactose metabolism                     | <i>agaV/kbaZ/melA/galT/pfkB/glk/agaI/galK/gatZ/yihR/gatY/galM</i>                                                                                                                                            | 12 | 3.0×10 <sup>-3</sup> |
| eco00010 | Glycolysis / Gluconeogenesis             | <i>malX/agp/aldB/gapA/fbaB/nifJ/yeaD/pyk/adhE/yihX/pfkB/glk/ascF/ahr/yggF/eutG/yihR/ascB/gpmM/galM/aceF/ppsA</i>                                                                                             | 22 | 3.0×10 <sup>-3</sup> |
| eco02060 | Phosphotransferase system (PTS)          | <i>malX/mtlA/cmtA/agaV/ulaC/murP/treB/ulaA/nagE/ascF/ulaB/srIE/cmtB</i>                                                                                                                                      | 13 | 0.01                 |
| eco00650 | Butanoate metabolism                     | <i>pflB/frdB/frdA/frdC/frdD/tdcE/nifJ/adhE/ydiF/ilvM/yihU/dmlA/ilvN/gabD</i>                                                                                                                                 | 14 | 0.01                 |
| eco00051 | Fructose and mannose metabolism          | <i>mtlA/fbaB/mak/xylA/cmtA/fucA/rhaB/pfkB/mtlD/sorE/hxpA/yggF/srIE/cmtB/rhmD</i>                                                                                                                             | 15 | 0.05                 |

4

5
